# Supplementary material
Source: publisher figshare collection journal article supplement (https://acs.figshare.com/ndownloader/files/3817390)
Supplement: Supplementary file 1 [file 3817390]

## Supporting information

### Chemically Reduced Organic Small Molecule based Lithium Battery with Improved Efficiency

Manik E Bhosale, and Kothandam Krishnamoorthy\*

Theoretical capacity of the molecules was calculated by following the reported procedure.<sup>[1]</sup> The formula for theoretical capacity calculation is

$$\text{Theoretical capacity} = (26800n/M)$$

Where n = number of electrons involved

M = molecular weight of the active substance

$$\begin{aligned}\text{Theoretical capacity for Benzoic-PDI} &= (26800 \times 2 / 630) \\ &= 85 \text{ mAh/g}\end{aligned}$$

$$\begin{aligned}\text{Theoretical capacity for Phenyl-PDI} &= (26800 \times 2 / 542) \\ &= 98 \text{ mAh/g}\end{aligned}$$

The volumetric capacity ( $C_v$ ) of the electrode is calculated by following reported procedure.<sup>[2]</sup>

$$C_v (\text{mAh/cm}^3) = C_g (\text{mAh/g}) \times \rho (\text{g/cm}^3)$$

Where  $C_g$  = gravimetric capacity of the electrode

$\rho$  = nominal tap density of the electrode which is calculated based on the weight of the active material and geometry of our electrode

**TableS1:** Volumetric capacity at different C rate

|     | Volumetric capacity<br>(mAh/cm <sup>3</sup> ) |
|-----|-----------------------------------------------|
| 1C  | 76                                            |
| 5C  | 117                                           |
| 10C | 122                                           |
| 20C | 65                                            |
| 30C | 50                                            |

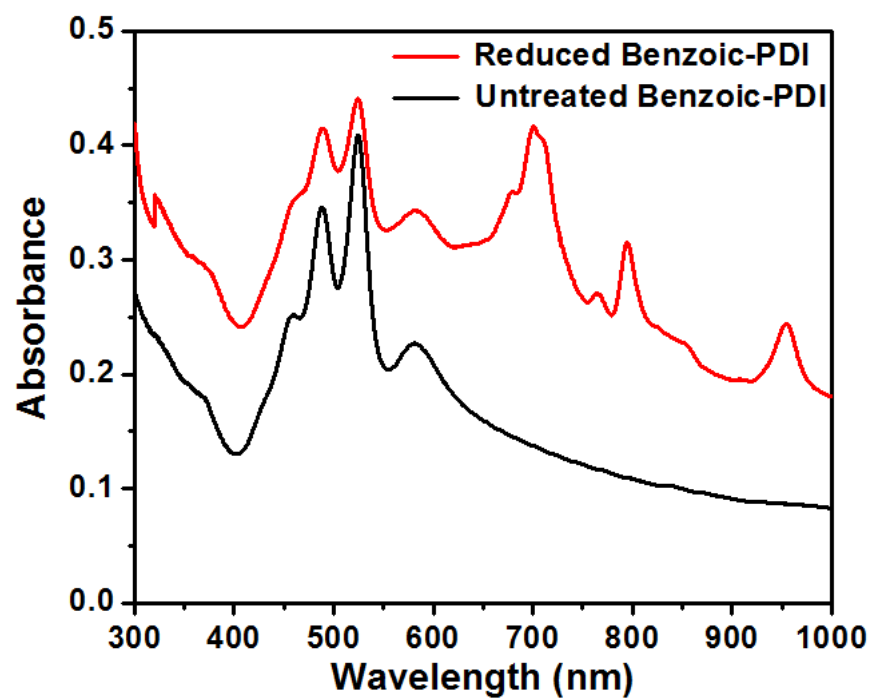

**Figure S1.** UV- visible absorption spectra of reduced and untreated benzoic-PDI.

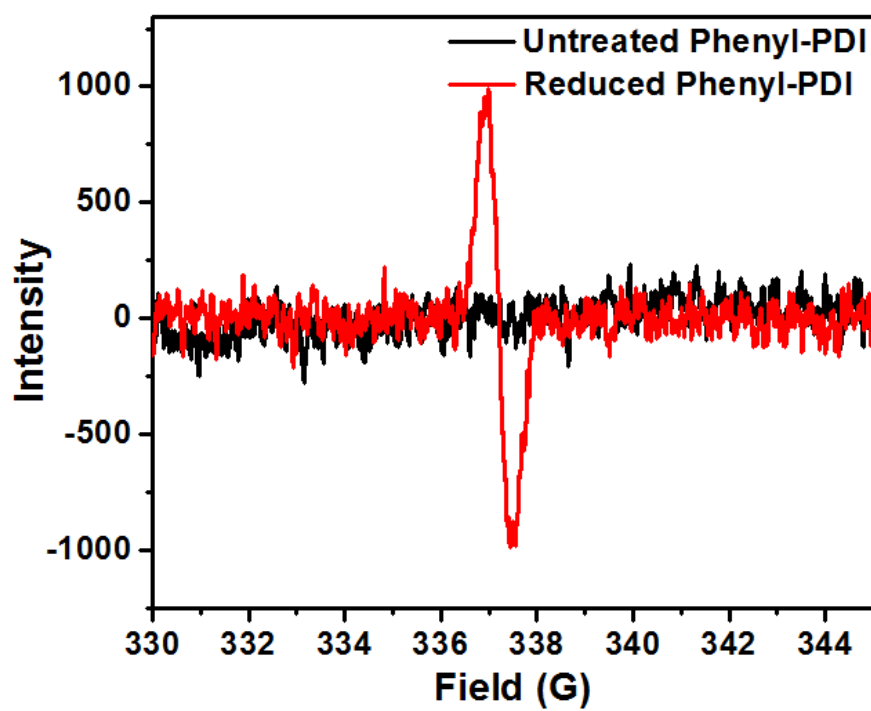

**Figure S2.** EPR spectra of reduced and untreated Phenyl-PDI.

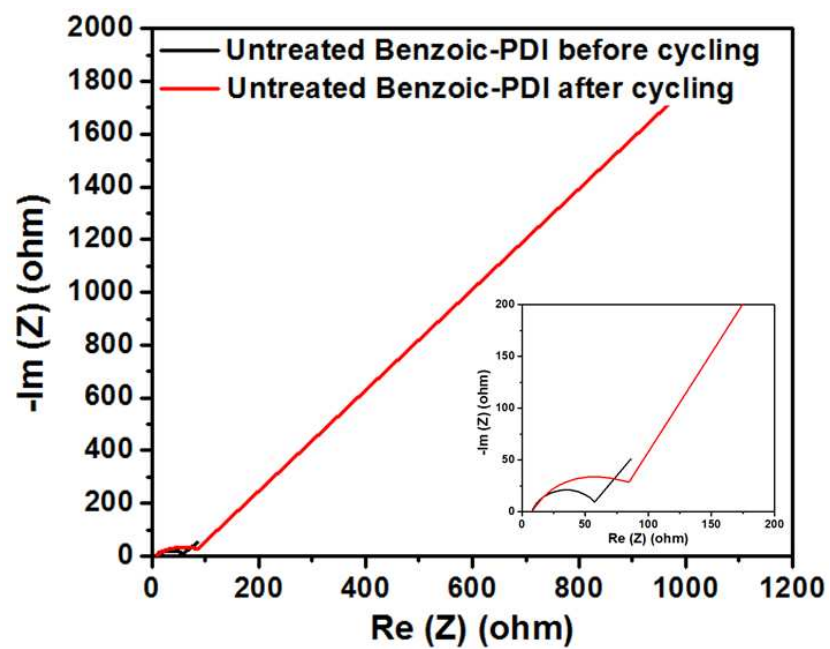

**Figure S3.** Impedance spectra of untreated Benzoic-PDI before and after 200 charge discharge cycles.

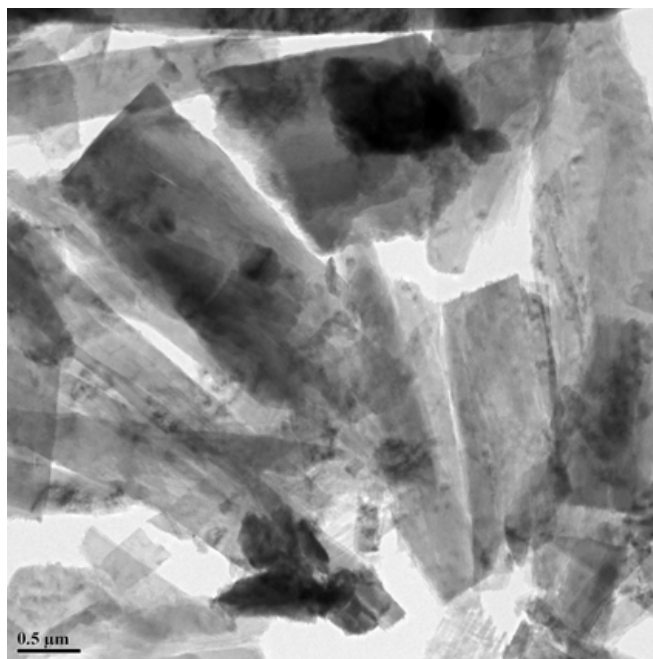

**Figure S4.** TEM image of untreated Benzoic-PDI.

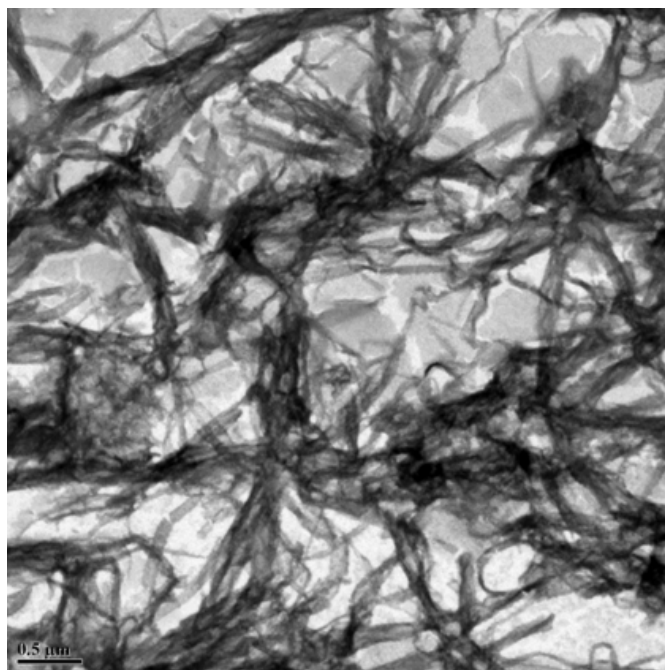

**Figure S5.** TEM image of reduced Benzoic-PDI.

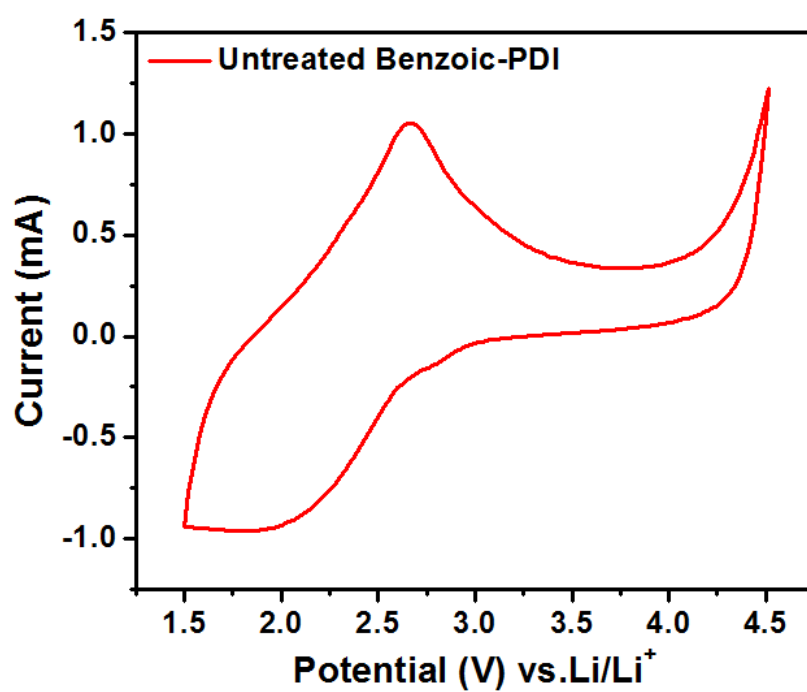

**Figure S6.** Cyclic voltammetry of untreated Benzoic-PDI

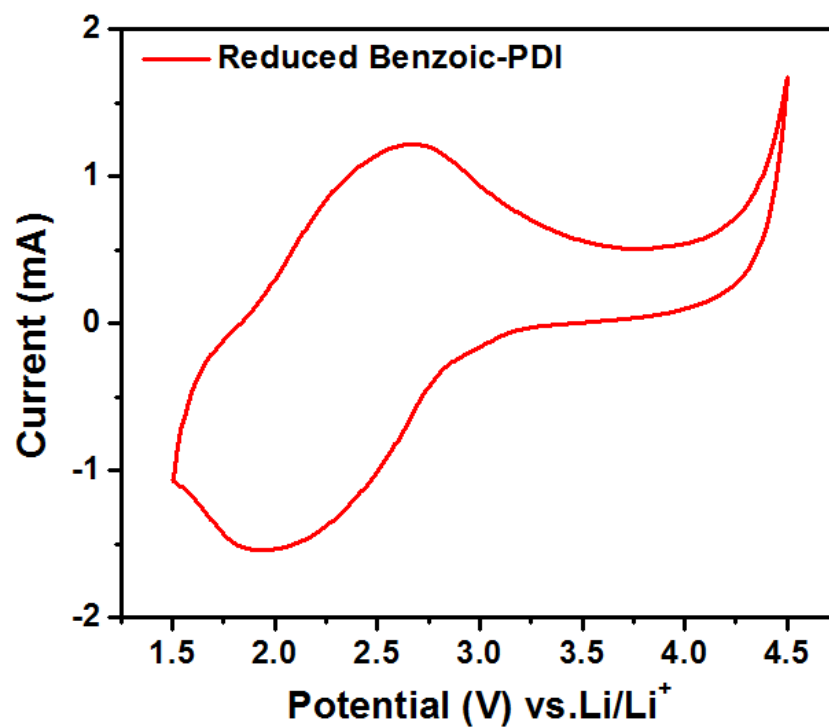

**Figure S7.** Cyclic voltammetry of reduced Benzoic-PDI.

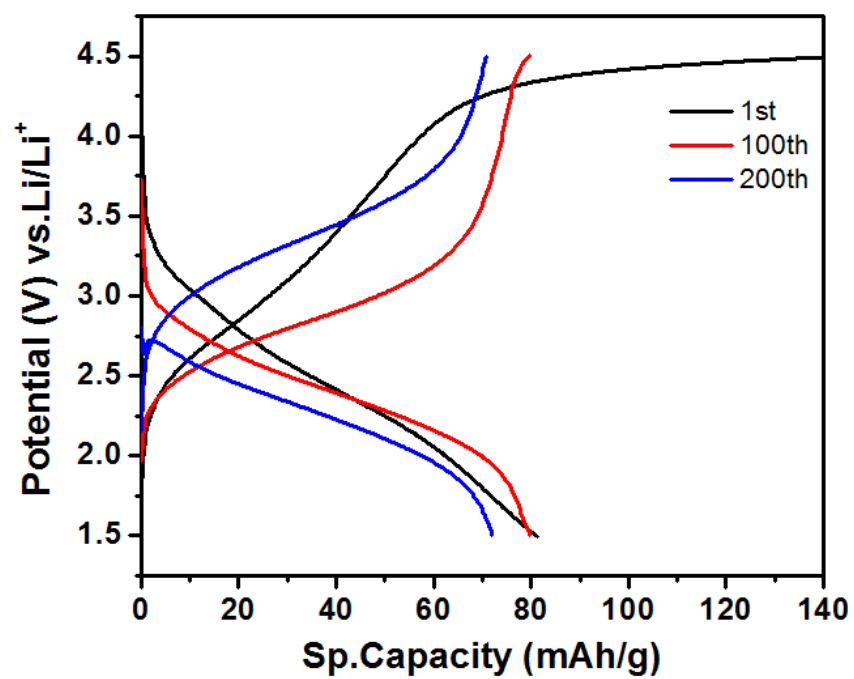

**Figure S8.** Charge-Discharge curves of reduced Benzoic-PDI at 5 C rate.

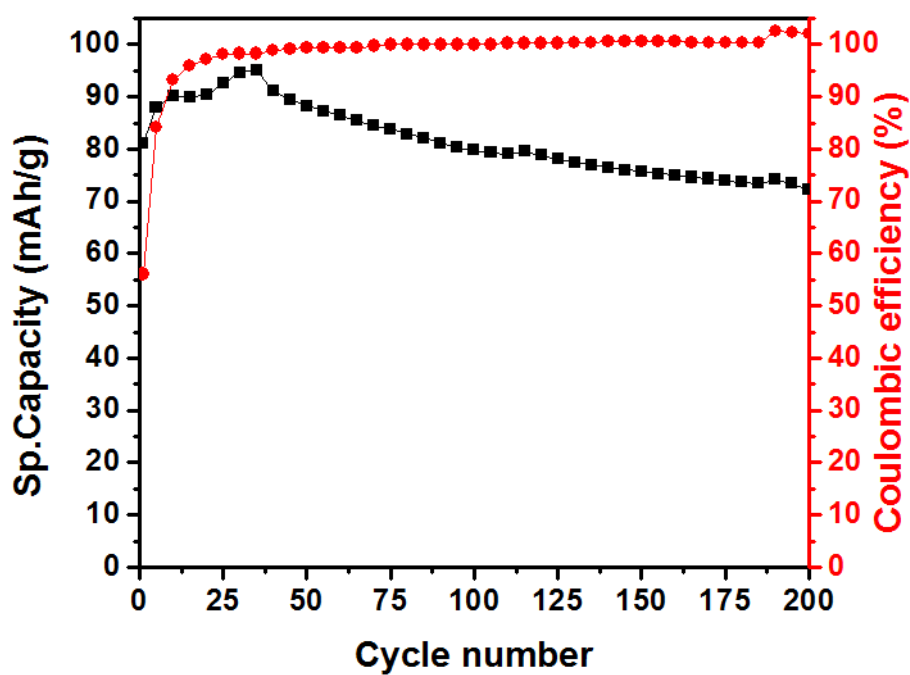

**Figure S9.** Coulombic efficiency and specific capacity of reduced Benzoic-PDI at 5 C rate as a function of cycle number.

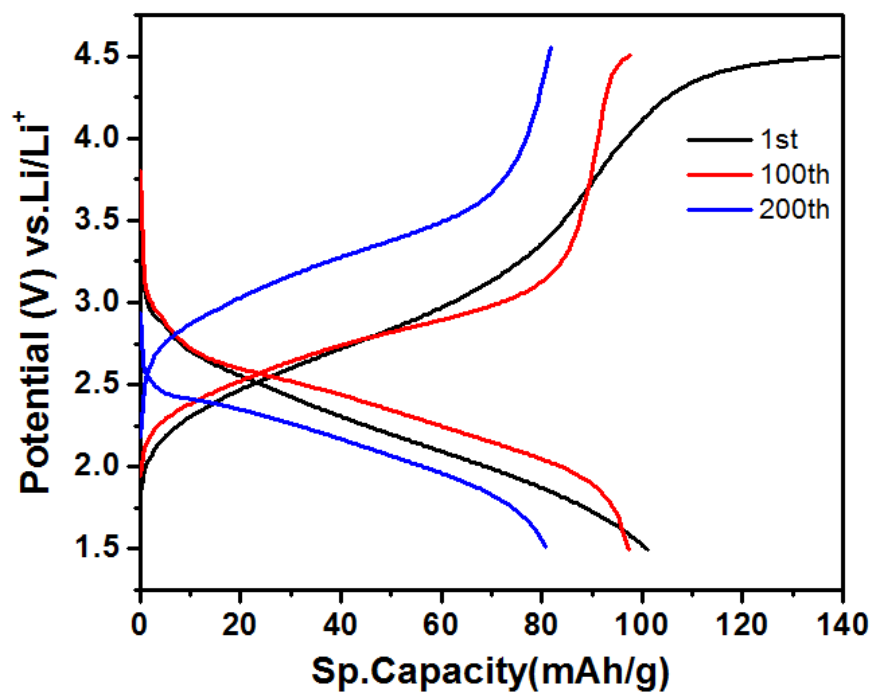

**Figure S10.** Charge-Discharge curves of reduced Benzoic-PDI at 10 C rate.

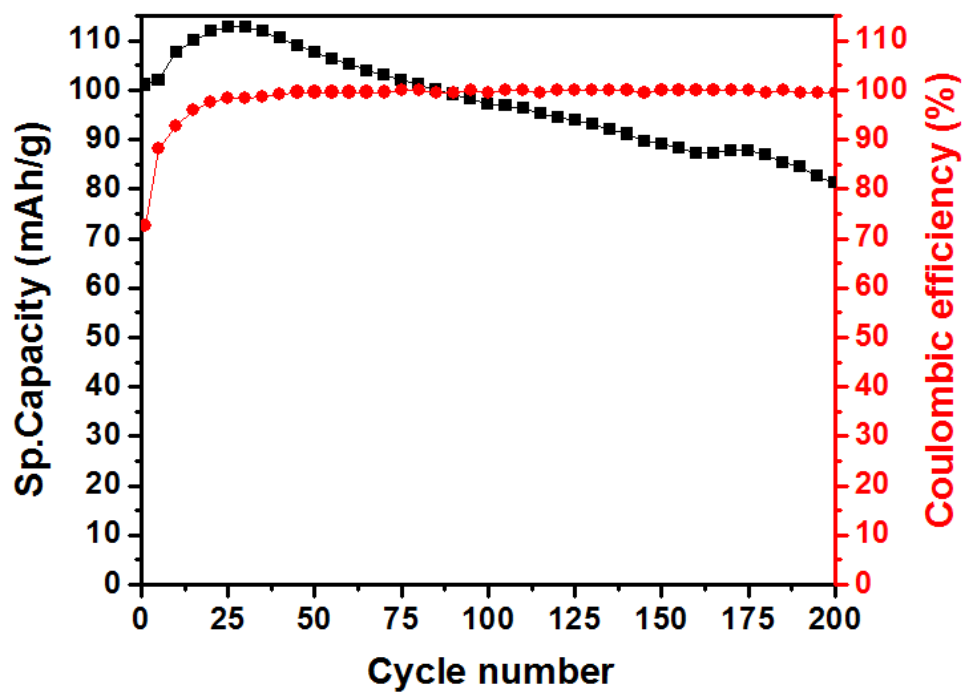

**Figure S11.** Coulombic efficiency and specific capacity of reduced Benzoic-PDI at 10 C rate as a function of cycle number.

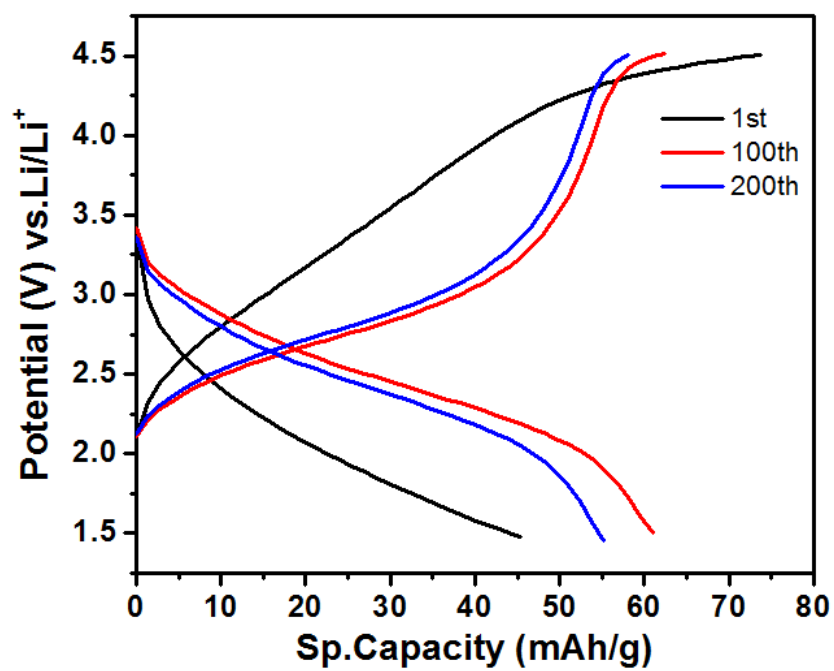

**Figure S12.** Charge-Discharge curves of reduced Benzoic-PDI at 30 C rate.

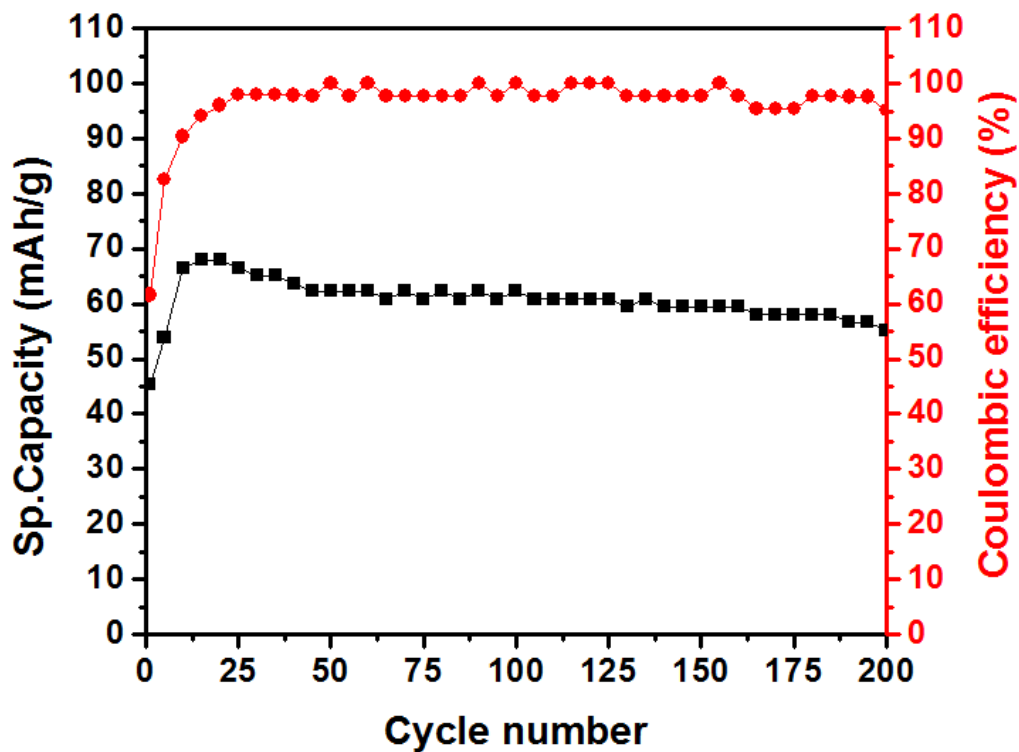

**Figure S13.** Coulombic efficiency and specific capacity of reduced Benzoic-PDI at 30 C rate as a function of cycle number.

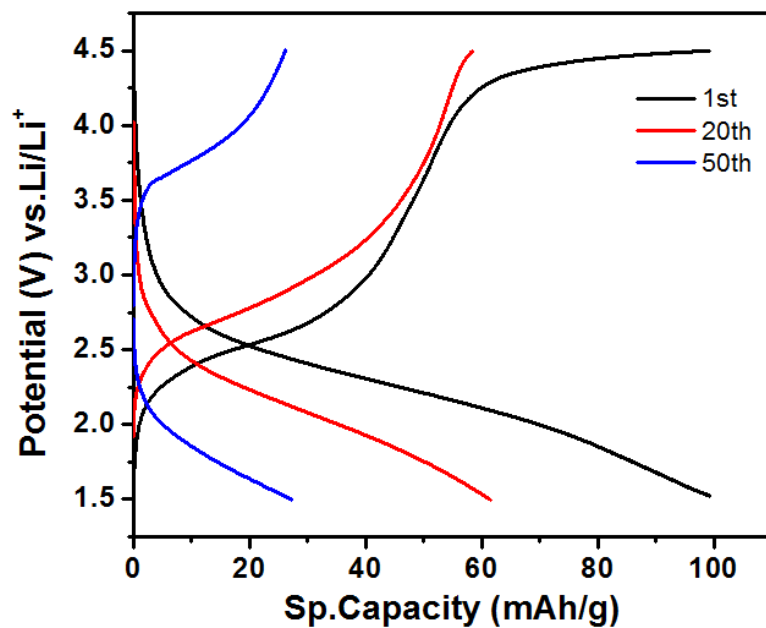

**Figure S14.** Charge-Discharge curves of untreated Benzoic-PDI at 0.5 C rate.



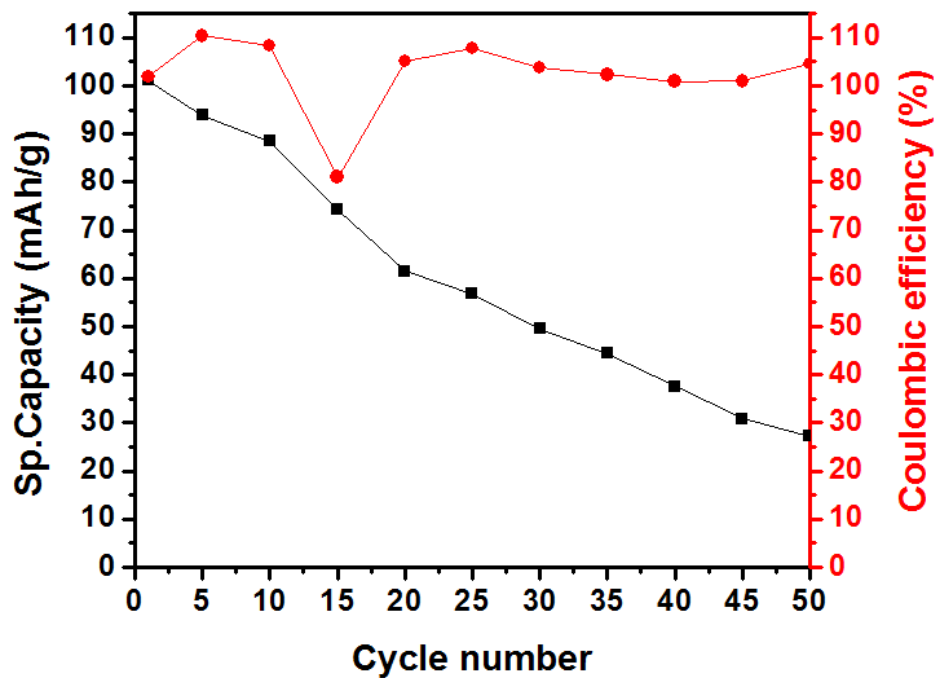

**Figure S15.** Coulombic efficiency and specific capacity of untreated Benzoic-PDI at 0.5 C rate as a function of cycle number.

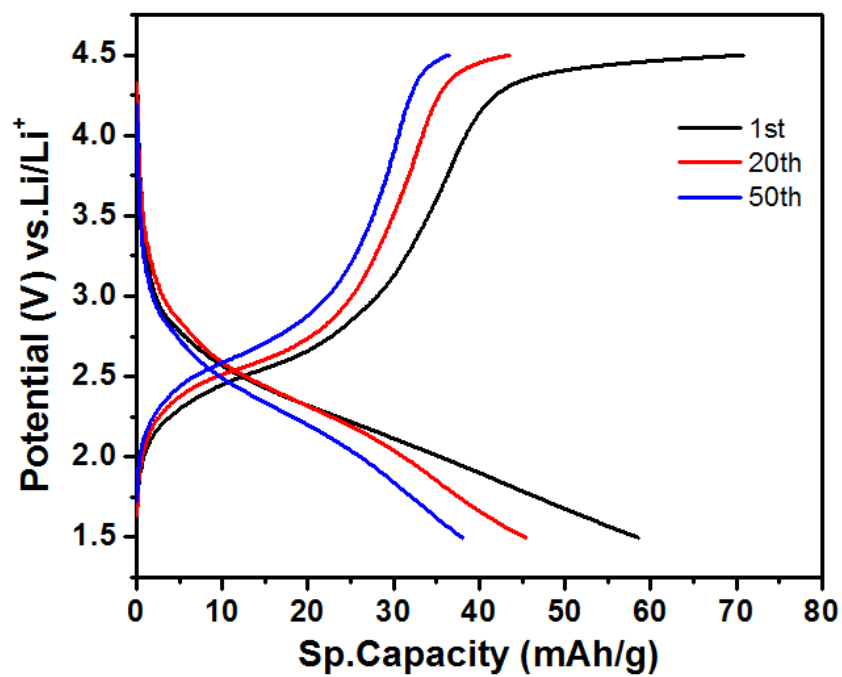

**Figure S16.** Charge-Discharge curves of untreated Benzoic-PDI at 1 C rate.

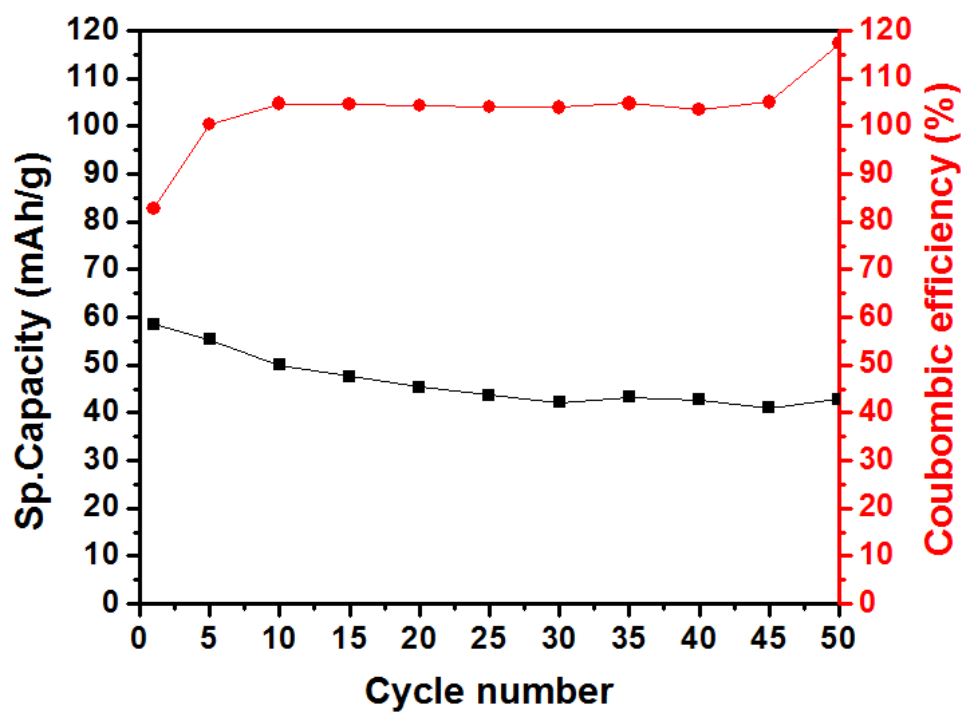

**Figure S17.** Coulombic efficiency and specific capacity of untreated Benzoic-PDI at 1 C rate as a function of cycle number.

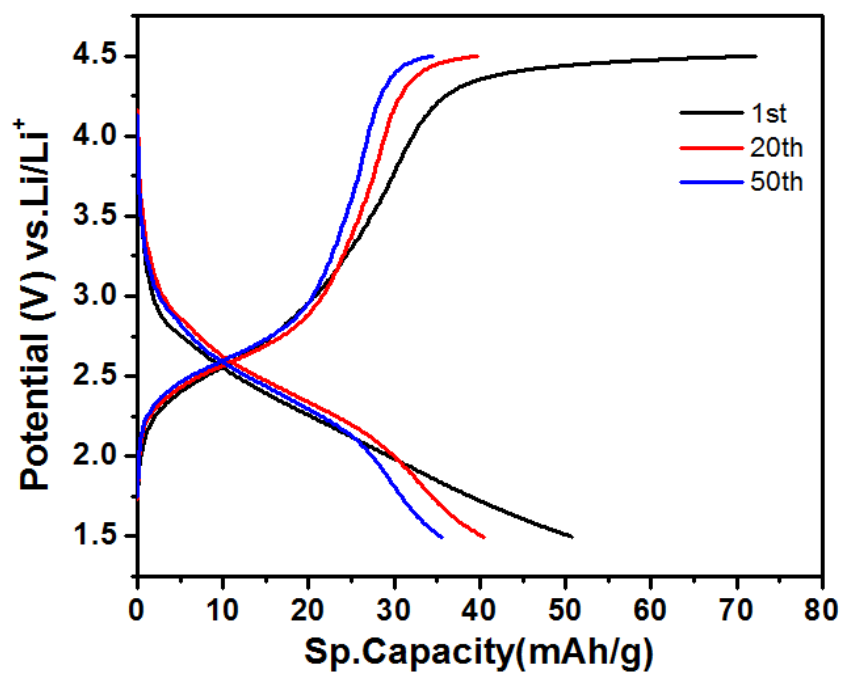

**Figure S18.** Charge-Discharge curves of untreated Benzoic-PDI at 2 C rate.

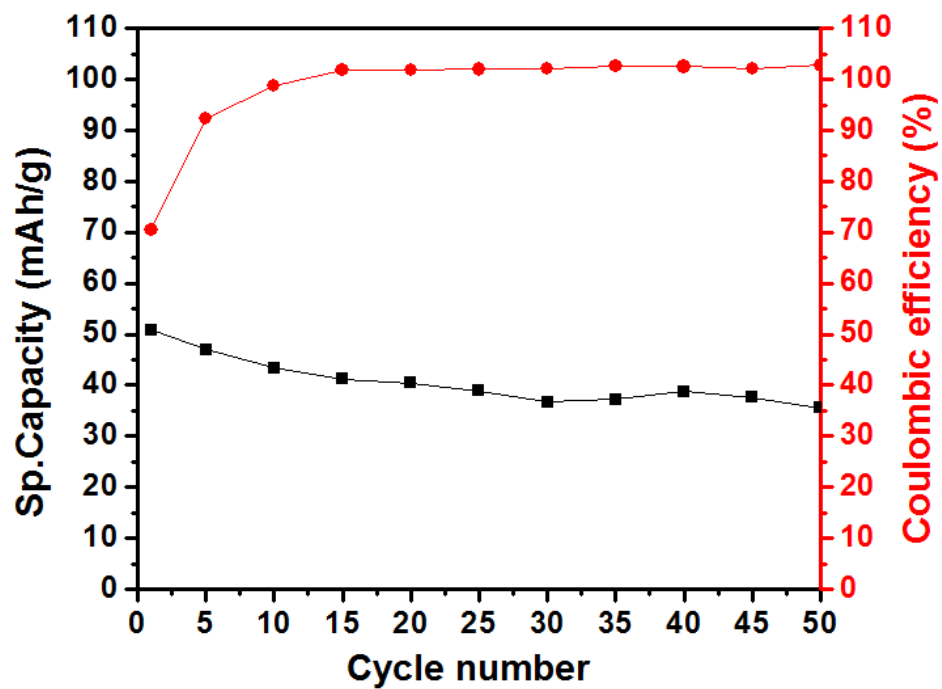

**Figure S19.** Coulombic efficiency and specific capacity of untreated Benzoic-PDI at 2 C rate as a function of cycle number.

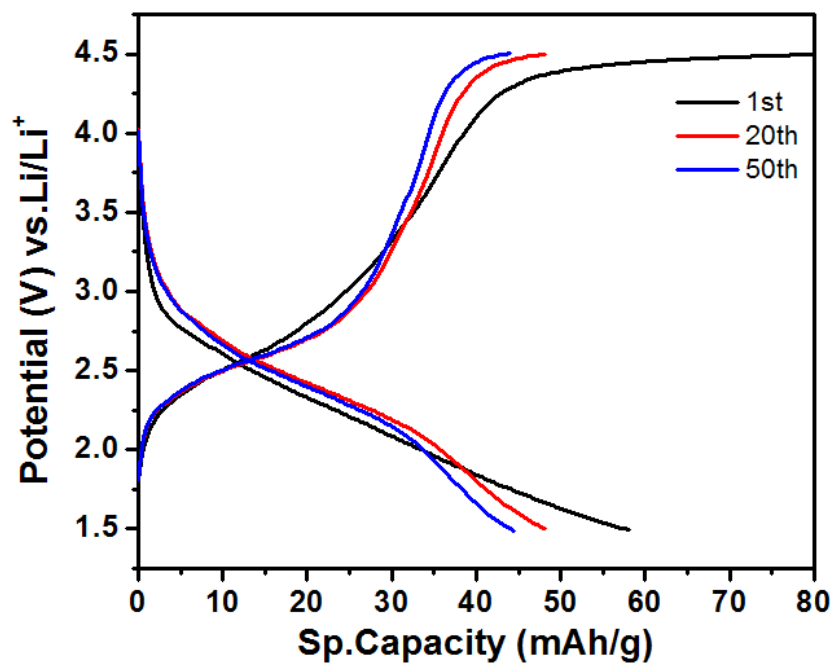

**Figure S20.** Charge-Discharge curves of untreated Benzoic-PDI at 5 C rate.

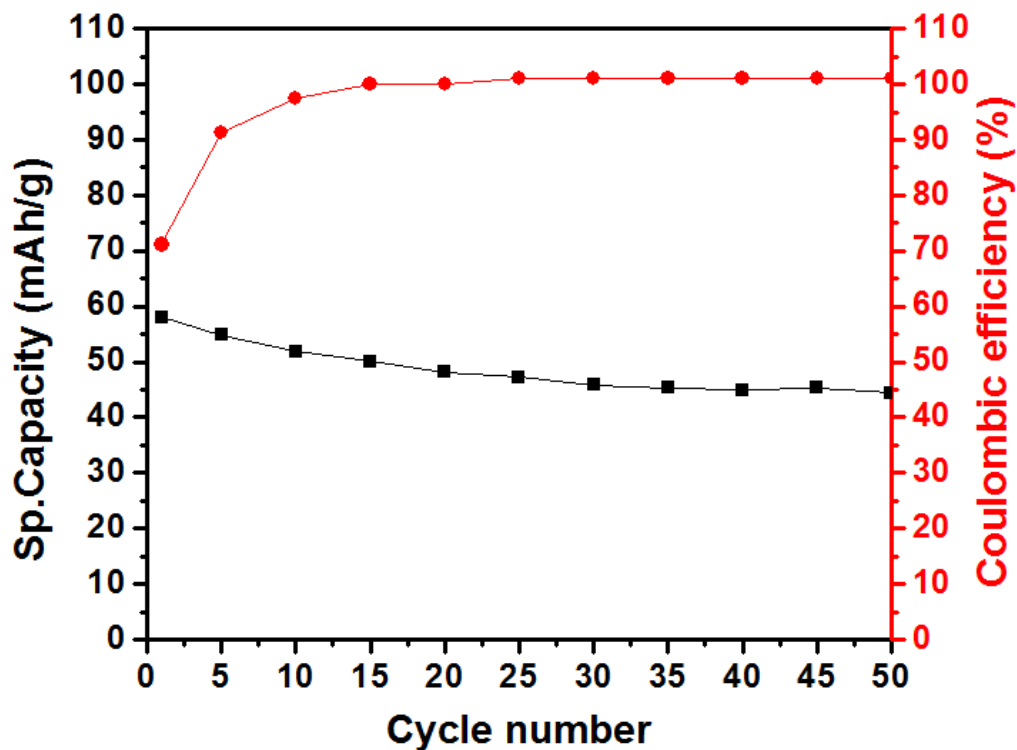

**Figure S21.** Coulombic efficiency and specific capacity of untreated Benzoic-PDI at 5 C rate as a function of cycle number.

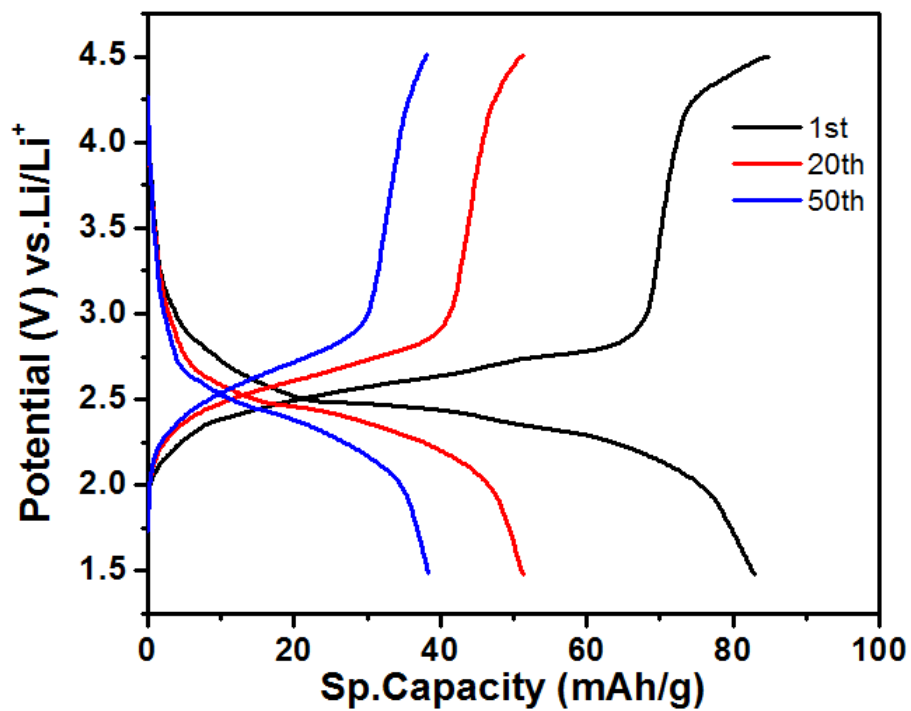

**Figure S22.** Charge-Discharge curves of reduced Phenyl-PDI at 5 C rate.

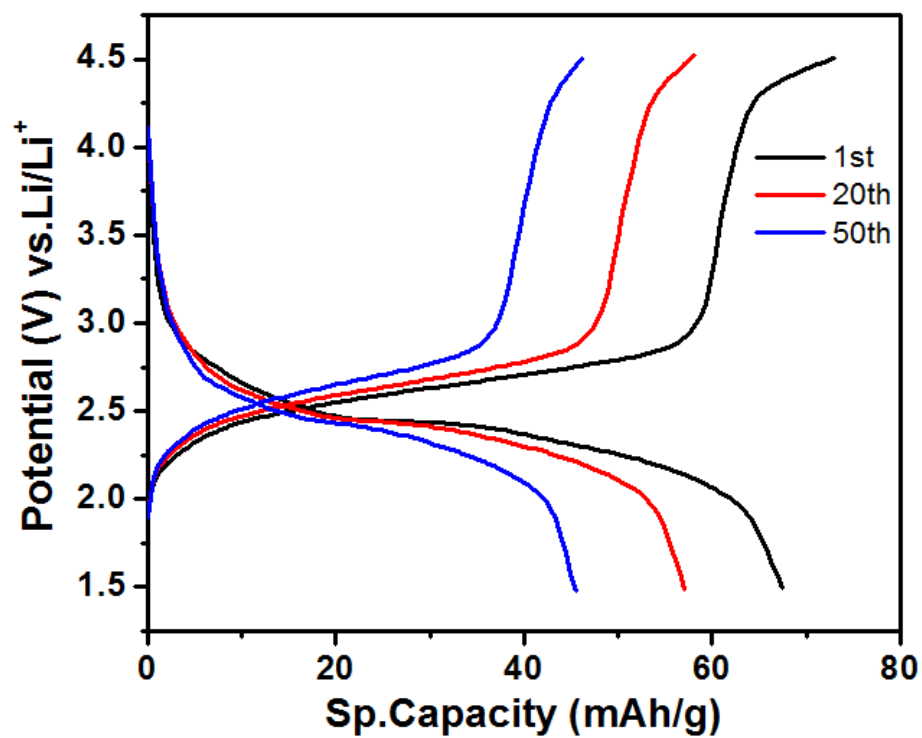

**Figure S23.** Charge-Discharge curves of reduced Phenyl-PDI at 10 C rate.

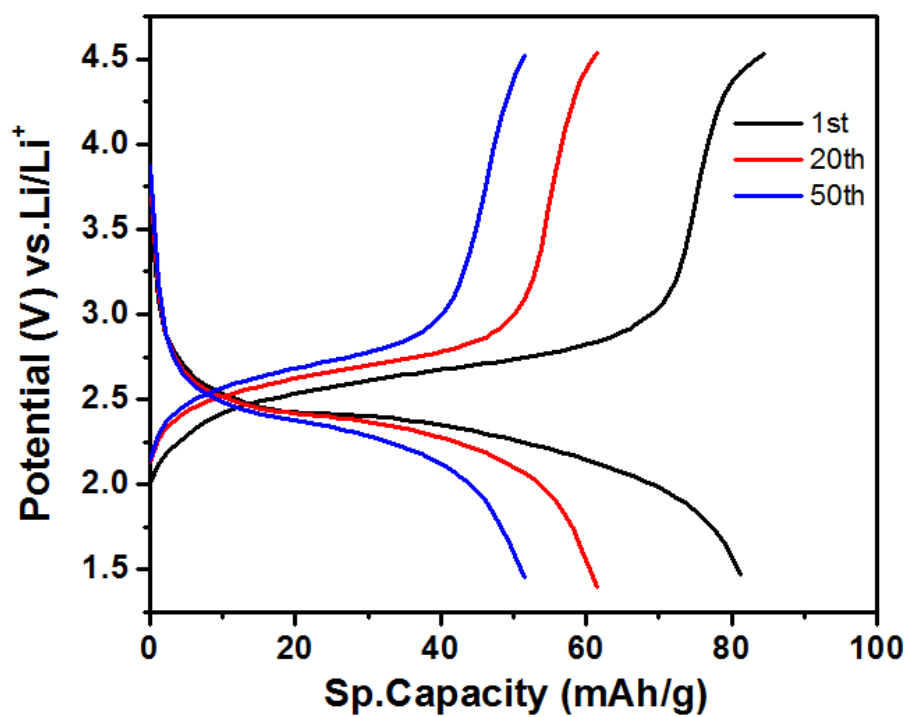

**Figure S24.** Charge-Discharge curves of reduced Phenyl-PDI at 20 C rate.

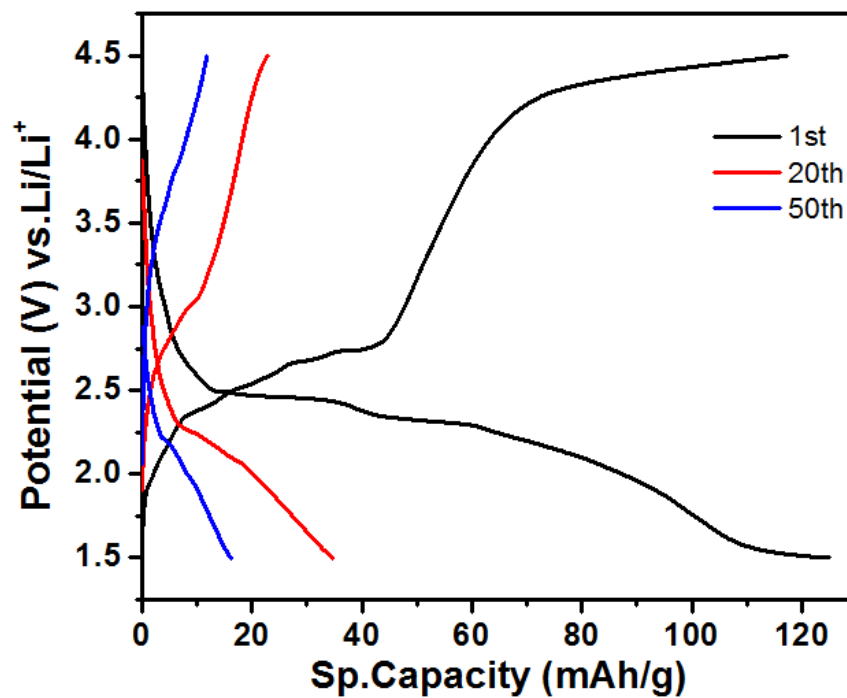

**Figure S25.** Charge-Discharge curves of untreated Phenyl-PDI at 0.5 C rate.

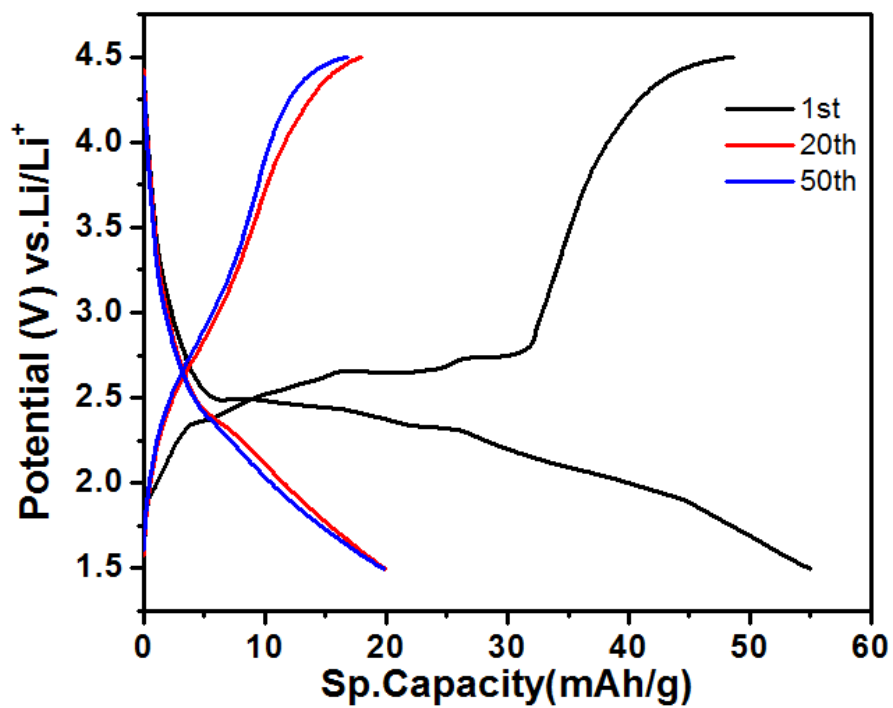

**Figure S26.** Charge-Discharge curves of untreated Phenyl-PDI at 1 C rate.

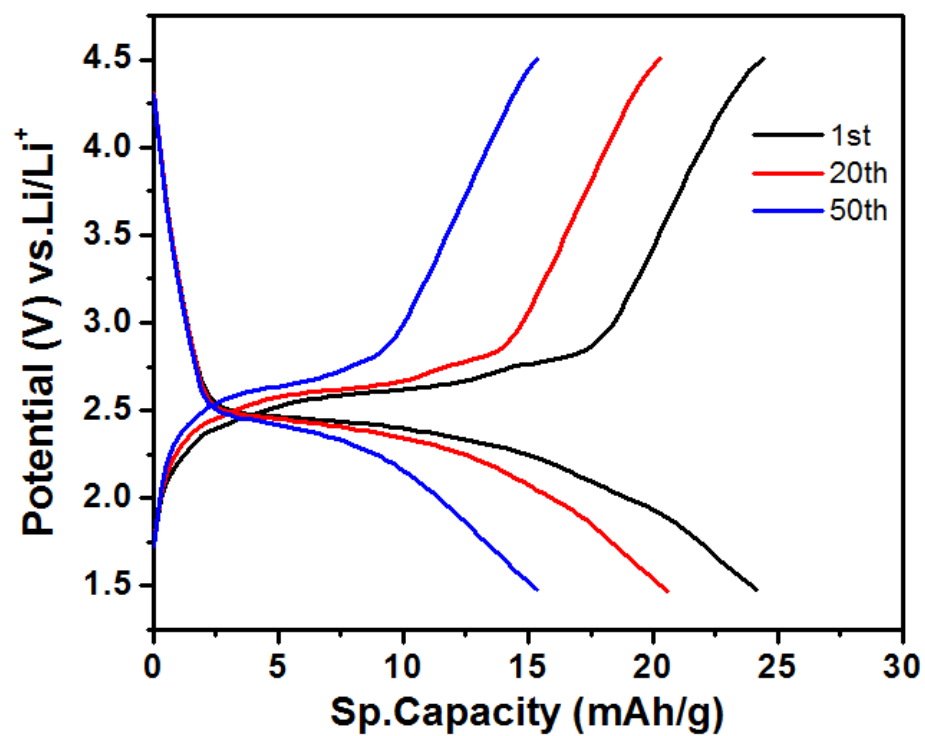

**Figure S27.** Charge-Discharge curves of untreated Phenyl-PDI at 5 C rate.

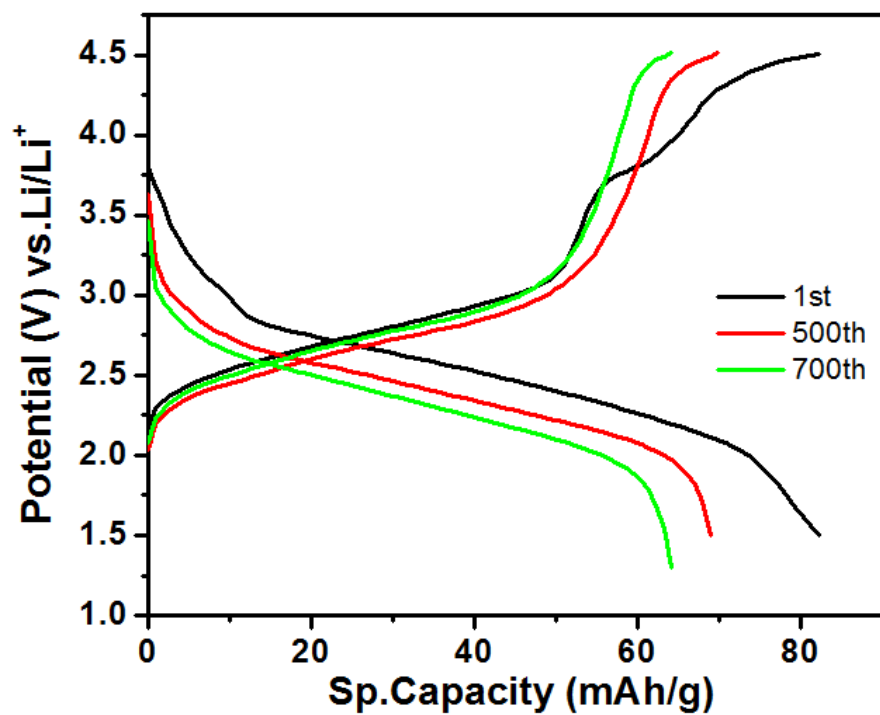

**Figure S28.** Charge-Discharge curves of reduced Benzoic-PDI at 20C rate.

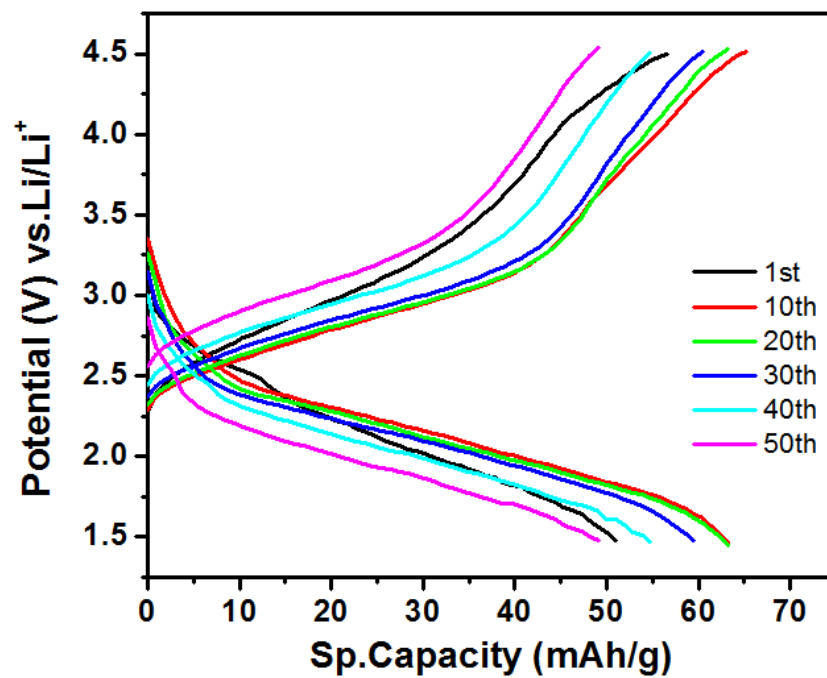

**Figure S29.** Charge-Discharge curves of reduced Benzoic-PDI at 20C rate of high mass loading (4.5 mg).

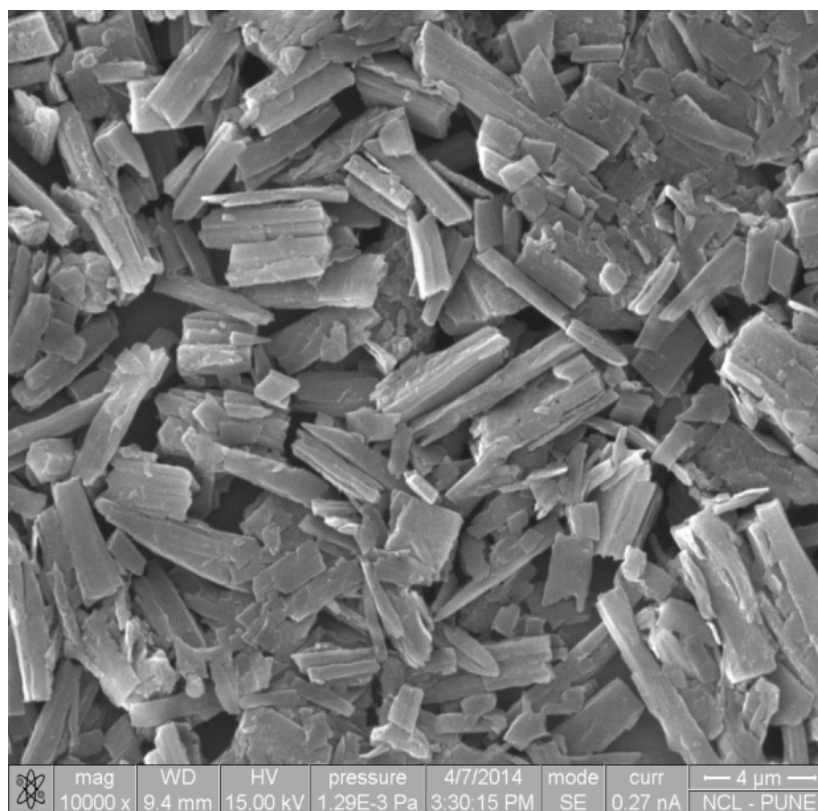

**Figure S30.** SEM image of untreated Benzoic-PDI.



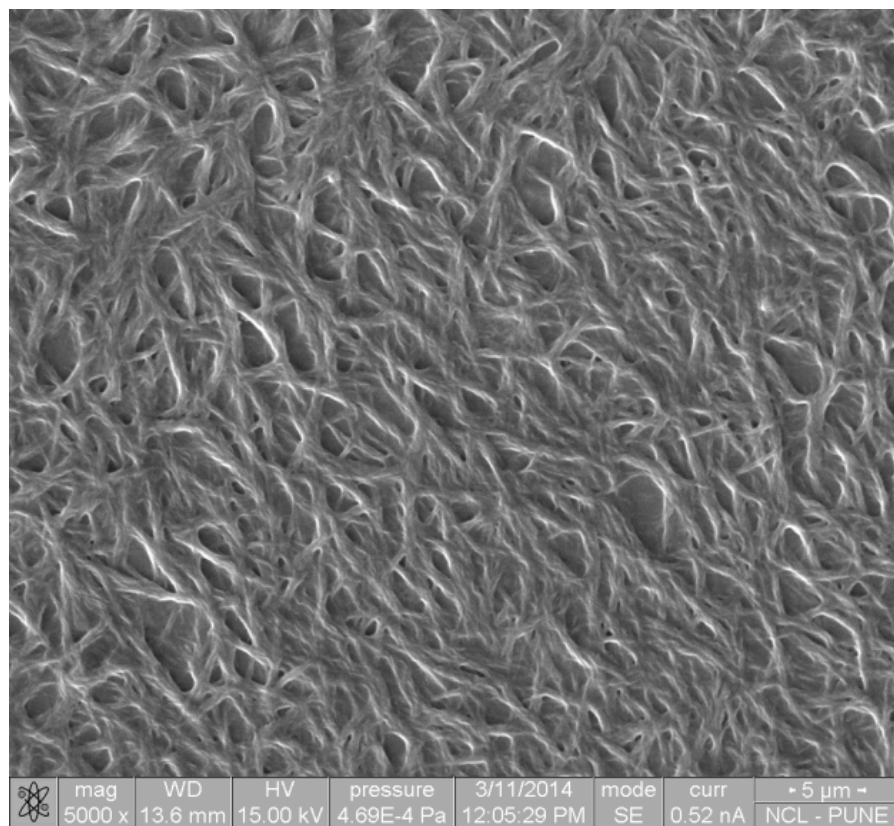

**Figure S31.** SEM image of reduced Benzoic-PDI.

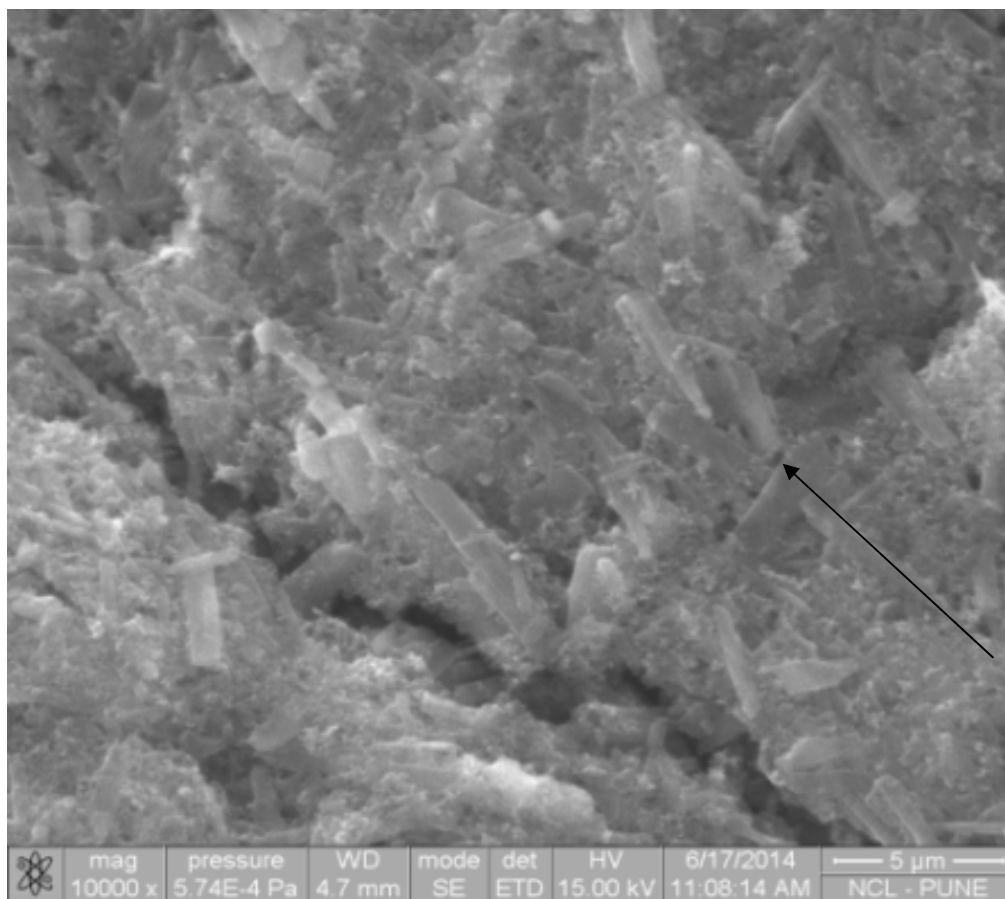

**Figure S32.** SEM image of untreated Phenyl-PDI before charge discharge cycling.

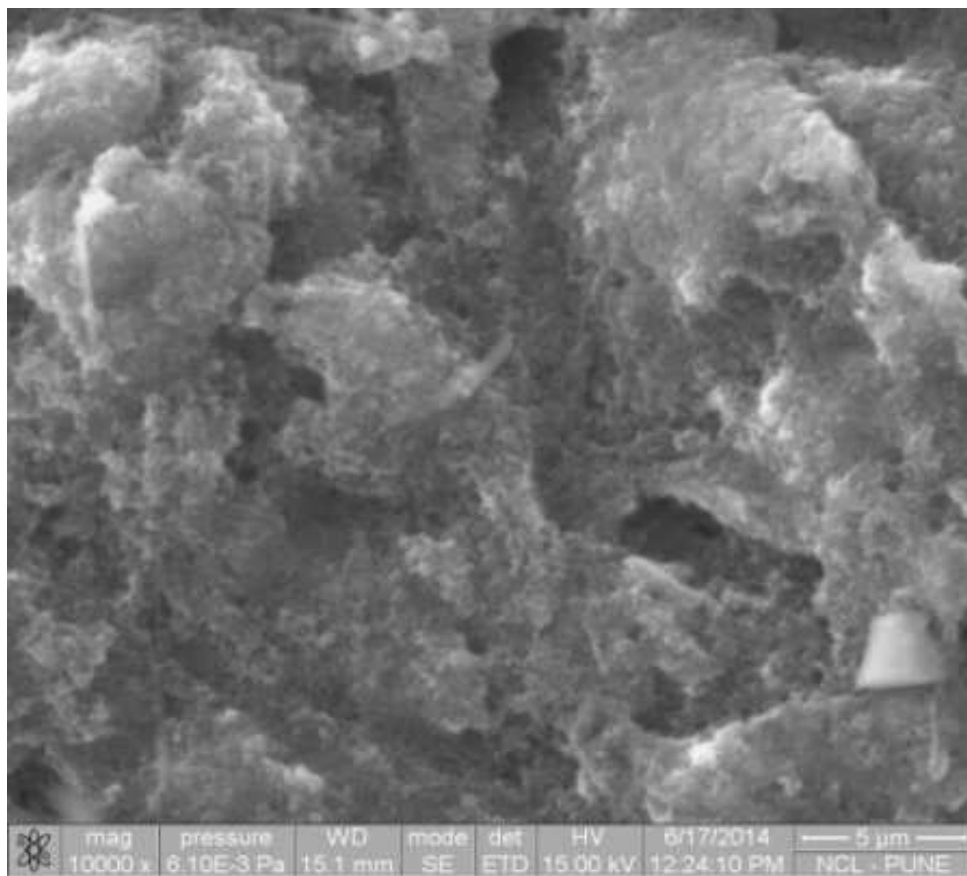

**Figure S33.** SEM image of untreated Phenyl-PDI after charge discharge cycling.

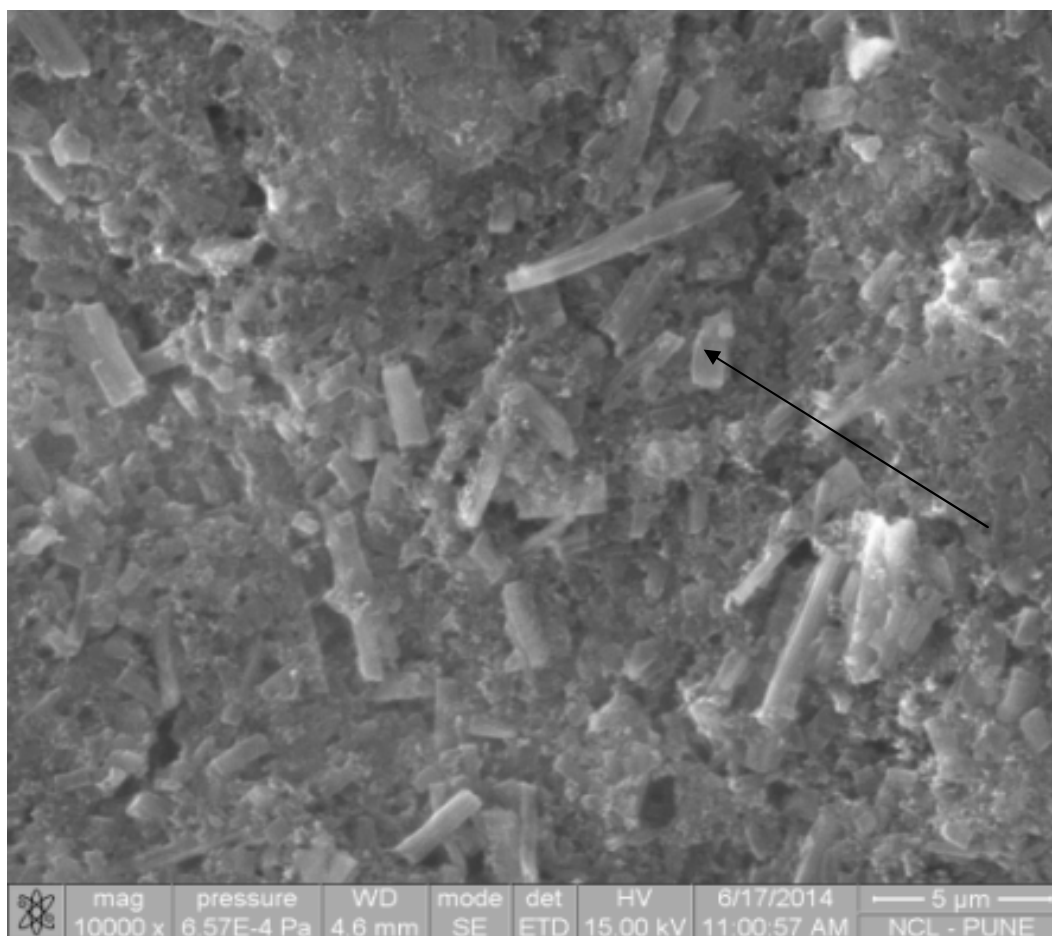

**Figure S34.** SEM image of untreated Benzoic-PDI before charge discharge cycling.

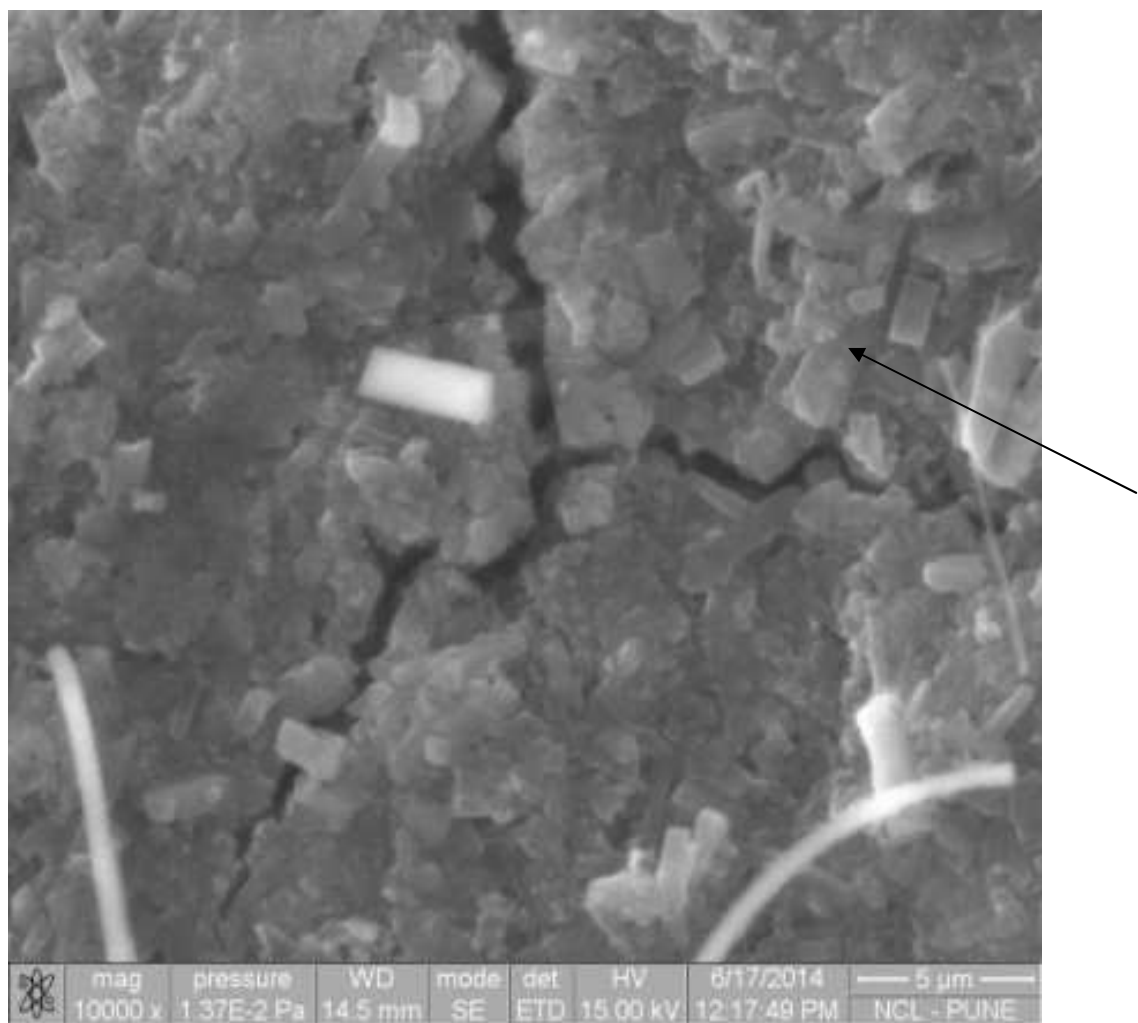

**Figure S35.** SEM image of untreated Benzoic-PDI after charge discharge cycling.

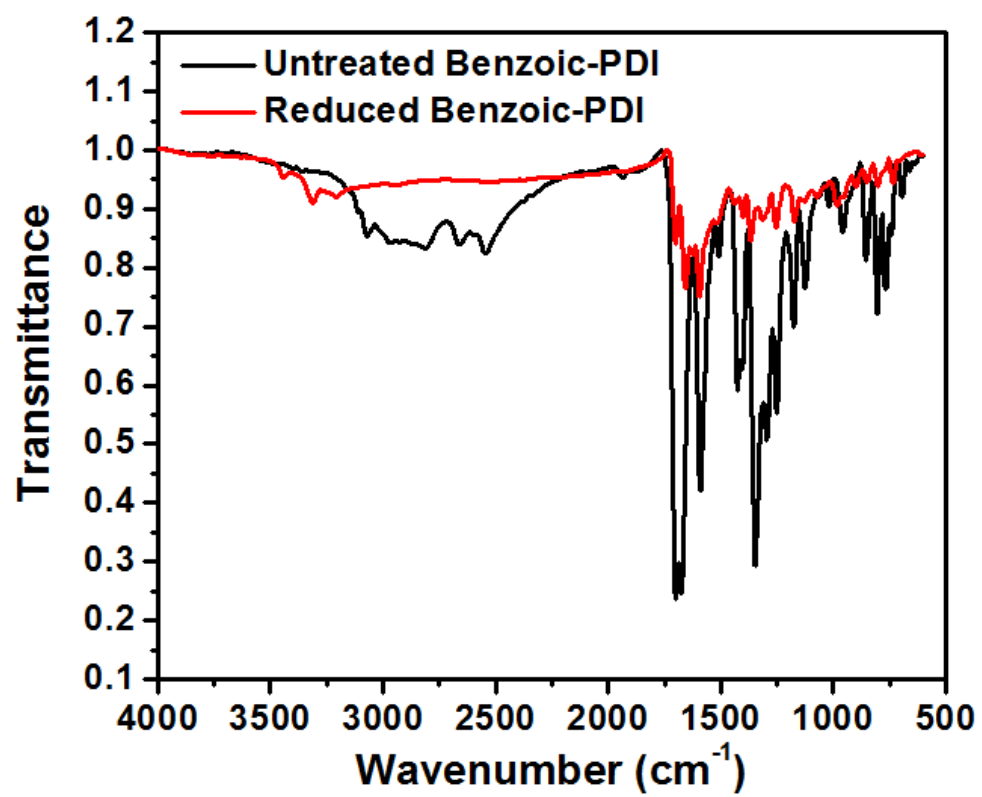

*Figure S36.* FTIR of untreated and reduced Benzoic-PDI.

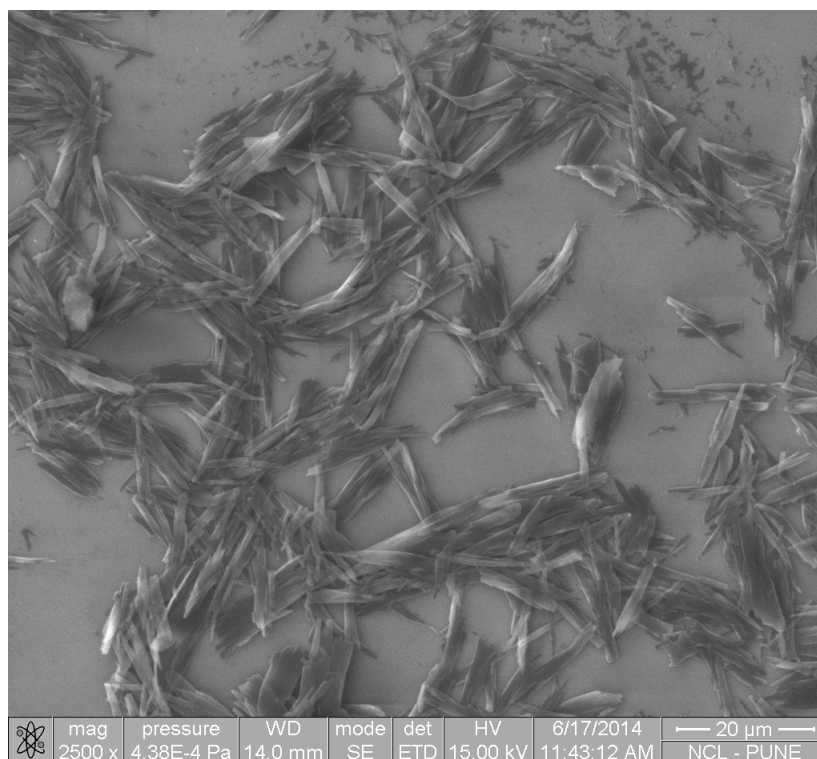

**Figure S37.** SEM image of untreated Phenyl-PDI.

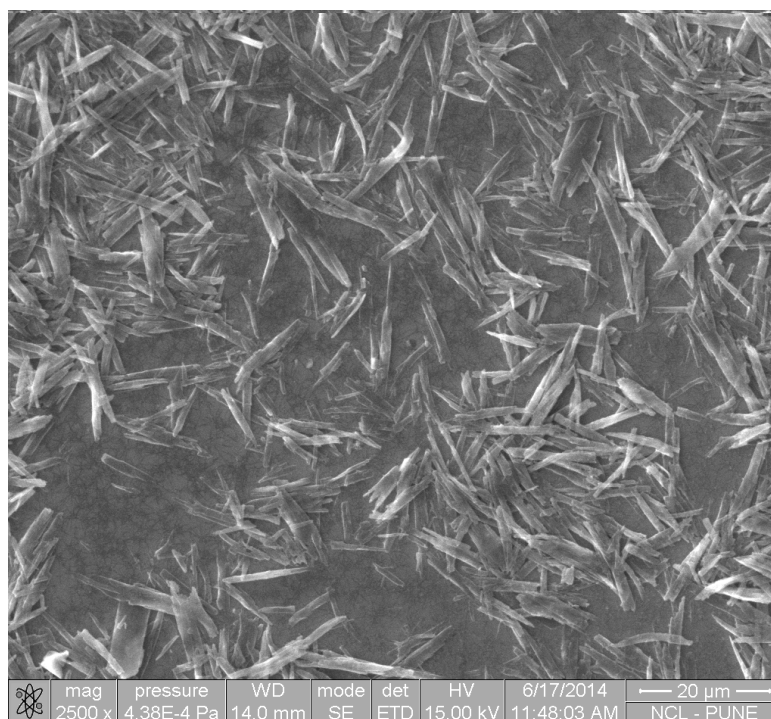

**Figure S38.** SEM image of reduced Phenyl-PDI.

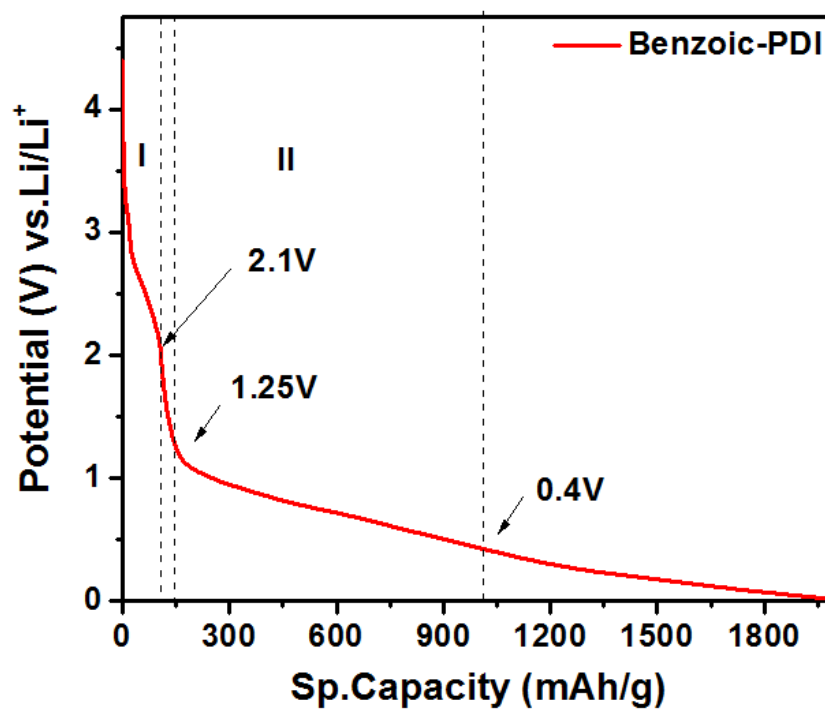

**Figure S39.** Deep discharge of Benzoic-PDI.



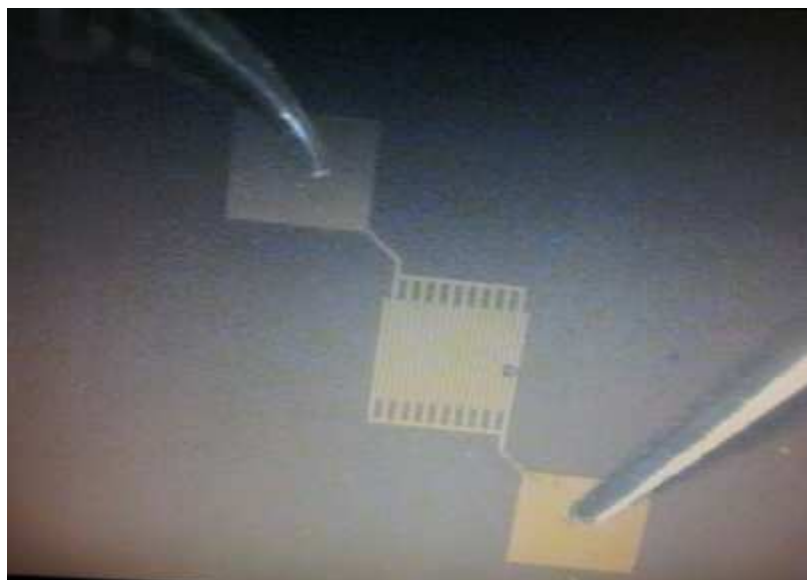

**Figure S40.** Photograph of interdigitated microelectrodes used for the conductivity measurements.

## References

- [1] Han, C.; Li, Z.; Li, W.-J.; Chou, S.-L.; Dou, S.-X. *J. Mater. Chem. A*, **2014**, 2, 11683.
- [2] Wang, B.; Li, X.; Qiu, T.; Luo, B.; Ning, J.; Li, J.; Zhang, X.; Liang, M.; Zhi, L. *Nano Lett.* **2013**, 13, 5578.
